# Supplementary material for: 5′ Region Large Genomic Rearrangements in the BRCA1 Gene in French Families: Identification of a Tandem Triplication and Nine Distinct Deletions with Five Recurrent Breakpoints
Source: MDPI journal article supplement (doi:10.3390/cancers13133171), 2021-06-25
Supplement: s1 [file s1]

**Table S2: French COVAR group collaborators (COsegregation of VARiants in the *BRCA1/2* and *PALB2* genes)**

(<https://clinicaltrials.gov/ct2/show/NCT01689584>)

| Town (France)              | Center                                                                   | Members                                                                                                                                                                              |
|----------------------------|--------------------------------------------------------------------------|--------------------------------------------------------------------------------------------------------------------------------------------------------------------------------------|
| Amiens                     | CHU Amiens                                                               | Florence Amram, Michèle Mathieu-Dramard, Gilles Morin, Bénédicte Demeer                                                                                                              |
| Angers                     | ICO - Centre Paul Papin<br>Service de Génétique Médicale                 | Claire Le Hetet, Olivier Ingster, Marie-Emmanuelle Morin-Meschin                                                                                                                     |
| Angoulême                  | Centre Hospitalier d'Angoulême<br>Oncogénétique                          | Paul Gesta, Stéphanie Chieze-Valero                                                                                                                                                  |
| Avignon                    | Institut Sainte-Catherine<br>Oncogénétique                               | Julie Mestre, Hélène Dreyfus                                                                                                                                                         |
| Besançon                   | CHU Besançon ; Hôpital Saint-Jacques ; Service de Génétique Biologique   | Céline Populaire, Marie-Agnès Collonge-Rame, Jean-Luc Bresson,                                                                                                                       |
| Bordeaux                   | Institut Bergonié                                                        | Michel Longy; Emmanuelle Barouk-Simonet, Pierre Macquere, Sabine Raad, Virginie Bubien; Anais Dupre, Henri Margot, Françoise Bonnet, Virginie Bubien, Natalie Jones, Nicolas Sévenet |
| Bordeaux                   | CHU- Groupe Hospitalier Pellegrin                                        | Cécile Gaudebout, Noémie Bronnec, Julie Tinat                                                                                                                                        |
| Bourges                    | CH Jacques Coeur                                                         | Isabelle Mortemousque                                                                                                                                                                |
| Brest                      | CHU de Brest                                                             | Julie Ménard, Séverine Audebert-Bellanger                                                                                                                                            |
| Caen                       | Centre François Baclesse                                                 | Pascaline Berthet; Céline Heude, Agathe Ricou, Sophie Krieger, Laurent Castéra, Dominique Vaur                                                                                       |
| Chambery                   | Centre Hospitalier<br>Hôtel Dieu<br>Laboratoire de Génétique             | Sandra Ferrer, Charlotte Leblanc                                                                                                                                                     |
| Clermont-Ferrand           | Centre Jean Perrin - Département d'Oncogénétique                         | Nancy Uhrhammer, Maud Privat, Mathilde Gay-Bellile, Yves-Jean Bignon,                                                                                                                |
| Dijon                      | CHU de Dijon<br>Hôpital d'Enfants<br>Service de Génétique Médicale       | Vincent Goussot, Sophie Nambot, Salima El Chehadeh; Caroline Jacquot-Sawka, Laurence Faivre-Olivier                                                                                  |
| Fort de France, Martinique | CHU de Fort de France<br>Unité d'Oncogénétique                           | Odile Béra, Sarah Malsa                                                                                                                                                              |
| Grenoble                   | CHU de Grenoble                                                          | Helene Dreyfus, Clémentine Legrand, Gabrielle Le Guyadec, Anne Béchet, Marie Bidart, Dominique Leroux                                                                                |
| La Réunion                 | CHU Sud Réunion                                                          | Hanitra Ranjatoelina                                                                                                                                                                 |
| La Rochelle                | Centre Hospitalier Saint-Louis<br>Oncogénétique                          | Paul Gesta, Hakima Lallaoui                                                                                                                                                          |
| Le Havre                   | Hôpital Flaubert<br>Unité de Génétique                                   | Valérie LAYET                                                                                                                                                                        |
| Lille                      | Centre Oscar Lambret,<br>Département de cancérologie<br>Générale         | Audrey Mailliez, Berengere Legendre, Anne-Laure Conoy, Joelle Fournier, Françoise Revillion                                                                                          |
| Lille                      | CHRU LILLE<br>Hôpital Jeanne de Flandre<br>Service de Génétique Clinique | Sophie Lejeune, afane Brahimi, Laurence Bellengier, Sylvie Manouvrier-Hanu                                                                                                           |
| Limoges                    | CHU Dupuytren<br>Oncogénétique                                           | Laurence Vénat-Bouvet, Anais Grangier, Sandrine Lavau-Denes                                                                                                                          |

|                            |                                                                                              |                                                                                                                                                                                                                                                                                                                            |
|----------------------------|----------------------------------------------------------------------------------------------|----------------------------------------------------------------------------------------------------------------------------------------------------------------------------------------------------------------------------------------------------------------------------------------------------------------------------|
| Lyon                       | Centre Léon Bérard Lyon                                                                      | Valérie Bonadona; Sylvie Mazoyer ; Olga Sininilkova, Mélanie Léone, Adrien Buisson, Sandrine Handallou, Nadia Boutry-Kryza, Christine Lasset                                                                                                                                                                               |
| Lyon                       | Hospices civils de Lyon                                                                      | Juliette Santenard, Sophie Giraud                                                                                                                                                                                                                                                                                          |
| Marseille                  | Institut Paoli-Calmettes<br>Département d'Oncologie<br>Génétique                             | Audrey Remenieras, Doriane Livon, Hagay Sobol, Tetsuro Noguchi, Cornel Popovici, Violaine Bourdon, François Eisinger, Jessica Moretta-Serra, Catherine Noguès                                                                                                                                                              |
| Marseille                  | CHU La Timone, Département de<br>Génétique                                                   | Hélène Zattara                                                                                                                                                                                                                                                                                                             |
| Montpellier                | CHU Arnaud de Villeneuve -<br>Service de Génétique                                           | Jean-Marc Rey, Laurence Lode, Pierre-Olivier Harmand, Pascal Pujol, Paul Vilquin, Virginie Galibert, Isabelle Coupier                                                                                                                                                                                                      |
| Nancy                      | Centre Alexis Vautrin;<br>Oncogénétique                                                      | Elisabeth Luporsi, Dominique Saint-Dizier, Charlotte Benigni                                                                                                                                                                                                                                                               |
| Nancy                      | CHU Nancy ; Hôpital Brabois ;<br>Service de Génétique                                        | Myriam Bronner, Joanna Sokolowska-Gillois, Christophe Philippe, Sarab Lizard, Philippe Jonveaux                                                                                                                                                                                                                            |
| Nantes                     | ICO - Centre René Gauducheau<br>Unité d'Oncogénétique                                        | Capucine Delnatte, Virginie Guibert, Céline Garrec, Fabrice Airaud, Stéphane Béziau, Estelle Cauchin, Caroline Abadie                                                                                                                                                                                                      |
| Nantes                     | Centre Catherine de Sienne<br>Oncogénétique                                                  | Alain Lortholary, Alica Yvard                                                                                                                                                                                                                                                                                              |
| Nice                       | Centre Antoine Lacassagne - Nice                                                             | Véronique Mari; Jennifer Oudard, Marc Frenay                                                                                                                                                                                                                                                                               |
| Nîmes                      | CHRU Caremeau, Oncogénétique                                                                 | Jean Chiesa, Audrey Combes                                                                                                                                                                                                                                                                                                 |
| Niort                      | Centre Hospitalier de Niort<br>Oncogénétique                                                 | Jeanne Triquard, Stéphanie Chiez-Valéro, Paul Gesta                                                                                                                                                                                                                                                                        |
| Orléans                    | Hôpital de la Source<br>Génétique                                                            | Isabelle Mortemousque, Julie Genot, Edouard Cottreau                                                                                                                                                                                                                                                                       |
| Paris                      | Institut Curie site Paris<br>Génétique Oncologique                                           | Virginie Caux-Moncoutier, Lisa Golmard, Claude Houdayer, Muriel Belotti, Antoine Depauw, Jessica Le Gall, Maud Blanluet, Mathias Schwartz, Agnès Collet, Alice Fiévet, Caroline Lecerf, Marine Lementec, Anaïs Dupre, Mathilde Warcoin, Chrystelle Colas, Bruno Buecher, Marion Gauthier-Villars, Dominique Stoppa-Lyonnet |
| Paris                      | Groupe Hospitalier Pitié-Salpêtrière - Laboratoire<br>d'Oncogénétique et<br>d'Angiogénétique | Florence Coulet, Mathilde Warcoin, Erell Guillermin, Noémie Basset, Florent Soubrier, Veronica CUSIN, Patrick BENUSIGLIO                                                                                                                                                                                                   |
| Paris                      | Hôpital Tenon<br>Oncogénétique Clinique                                                      | Anne Fajac, Florent Soubrier, Patrick BENUSIGLIO, Nathalie Chabbert Buffet                                                                                                                                                                                                                                                 |
| Paris                      | HEGP                                                                                         | Geraldine Perkins, Diane Molière, Anne-Marie Birot, Pierre-Laurent Puig                                                                                                                                                                                                                                                    |
| Paris                      | Hôpital Saint-Antoine,<br>Département de génétique                                           | Jeanne NETTER-COTI, Patrick BENUSIGLIO                                                                                                                                                                                                                                                                                     |
| Paris                      | Hôpital Saint-Louis –<br>Oncogénétique                                                       | Odile Cohen-Haguenauer, Paul Vilquin, Daniel Toledano                                                                                                                                                                                                                                                                      |
| Pointe à Pitre, Guadeloupe | CHU de Pointe à Pitre                                                                        | Marilyn Lackmy-Port-Lis                                                                                                                                                                                                                                                                                                    |
| Poitiers                   | CHU La Milétrie<br>Oncogénétique                                                             | Paul Gesta, Stéphanie Chieze-Valero, Brigitte Gilbert-Dussardier                                                                                                                                                                                                                                                           |
| Reims                      | Polyclinique de Courlancy                                                                    | Nathalie Heil, Frédérique Carré-Pigeon                                                                                                                                                                                                                                                                                     |
| Reims                      | Institut Jean Godinot ; Service de                                                           | Tan Dat Nguyen; Helene Larbre, Fanny                                                                                                                                                                                                                                                                                       |

|               |                                                                        |                                                                                                                                                          |
|---------------|------------------------------------------------------------------------|----------------------------------------------------------------------------------------------------------------------------------------------------------|
|               | Génétique et Biologie de la Reproduction                               | Brayotel, David Bonnerave; Aude-Marie Savoye, Philippe Guilbert                                                                                          |
| Reims         | CHU de Reims ; Service de Génétique                                    | Dominique Gaillard ; Céline Poirsier ; Mozelle-Nivoix Monique, Anne Durlach                                                                              |
| Rennes        | Centre Eugène Marquis                                                  | Louise Crivelli, Vanessa Colombert, Enora Lejeune, Caroline Abadie                                                                                       |
| Rouen         | CHU de Rouen<br>Unité de Génétique Clinique                            | Annick Rossi, Isabelle Thevenet, Thierry Frebourg                                                                                                        |
| Saint-Etienne | CHU Saint-Etienne Hôpital Nord                                         | Marine Lebrun, Fabienne Prieur                                                                                                                           |
| Saint-Cloud   | Institut Curie<br>site Hôpital René Huguenin<br>Epidémiologie Clinique | Emmanuelle Fourme, Claire Saule, Ophélie Bertrand, Helene Delhommel, Chrystelle Colas                                                                    |
| Strasbourg    | Centre Paul Strauss ; Laboratoire de Biologie Tumorale                 | Laurène Rebattu, Danièle Muller, Hélène Nehme-Schuster                                                                                                   |
| Strasbourg    | Hopital Universitaire de Strasbourg                                    | Chistine Maugard                                                                                                                                         |
| Toulouse      | Institut Claudius Regaud<br>Laboratoire d'Oncogénétique                | Viviane Feillel; Norbert Lignon, Christine Toulas, Laurence Gladieff                                                                                     |
| Tours         | CHU Bretonneau ; Service de Génétique ; Génétique                      | Isabelle Mortemousque                                                                                                                                    |
| Troyes        | CHG Troyes                                                             | Monique Mozelle                                                                                                                                          |
| Valence       | Centre Hospitalier de Valence                                          | Marie-Noelle Bonnet-Dupeyron                                                                                                                             |
| Villejuif     | Institut Gustave Roussy                                                | Marine Guillaud-Bataille, Marina Dimaria, Sophie Villebasse, Odile Cabaret, Alice Fievet, Etienne Rouleau, Brigitte Bressac-De Paillerets, Olivier Caron |
