# Supplementary material for: 5′ Region Large Genomic Rearrangements in the BRCA1 Gene in French Families: Identification of a Tandem Triplication and Nine Distinct Deletions with Five Recurrent Breakpoints
Source: Cancers (Basel). 2021 Jun 25;13(13):3171. doi: 10.3390/cancers13133171 (PMC8268747; doi:10.3390/cancers13133171)
Supplement: Supplementary file 1 [file cancers-13-03171-s001.zip]

Archive with 4 entries (4 files):
- Figures.pdf
- Supplementary_figures-final_cancers.pptx
- Table S1.xlsx
- Table S2.pdf
