# Supplementary material for: 5′ Region Large Genomic Rearrangements in the BRCA1 Gene in French Families: Identification of a Tandem Triplication and Nine Distinct Deletions with Five Recurrent Breakpoints
Source: Cancers (Basel). 2021 Jun 25;13(13):3171. doi: 10.3390/cancers13133171 (PMC8268747; doi:10.3390/cancers13133171)
Supplement: Supplementary file 1 [file cancers-13-03171-s001.zip › Table S1.xlsx]

## Sheet: SuppT1
Supplementary table 1: Clinical and family data of patients carrying BRCA1 large genomic rearrangements (deletions and triplication)
Gene	Deleted or duplicated exons (MLPA, QMPSF)	Variation (g.)	Index case data	Pathology data	Co-occurrence of variants in BRCA2 or BRCA1 or in other genes + large rearrangements	Family data	Nb of patients in UMD-BRCA2 (8/10/14)	In CoVAR project	Co-segregation data
BRCA1	Exons 1a-2	g.chr17:43120187-43157120del	C1: Woman with bilateral BC (diagnosed at 37 and 48) and PC (diagnosed at 60)	Triple negative	No	F1: Sister with BC (diagnosed at 41), sister with BC and gynecological cancers (diagnosed at 43 and 58), 2 sisters with bilateral BC (diagnosed at 55/59 and 58/60), sister with PC (diagnosed at 61), father with PrC (diagnosed at 65), paternal aunt with BC (diagnosed before 88), 4 nieces with BC (diagnosed at 44, 37, 31 and 34)		No	3 Sisters with BC at 41, 55/59 and 58/60, sister PC and 1 niece with BC at 37 carry the variant, 1 sister CF, 2 nieces and daughter CF don't carry the variant.
		g.chr17:43118776-43155546del	C2: Woman with OC (diagnosed at 54)	NA	NA	F2: Sister with BC (diagnosed at 48), niece with BC (diagnosed at 24), father with PrC (diagnosed at 80)		No	NA
		g.chr17:43118776-43155546del	C3: Woman with BC (diagnosed at 33)	Triple negative	NA	F3: Mother with BC and endometrial cancers (diagnosed at 36 and 56), maternal grand-mother with OC (diagnosed at 40)		No	NA
		g.chr17:43118776-43155546del	C4: Woman with BC (diagnosed at 48)	NA	NA	F4: Sister with BC (diagnosed at 54); sister with OC (diagnosed at 54); brother with PrC (diagnosed at 71), father with PrC (diagnosed at 79), niece with BC (diagnosed at 24)		No	NA
		g.chr17:38,525,441_38,562,375del				F5: pas d'arbre
			C5: No information	NA	NA	NA			NA
	Exon 2 <1 kb		C6: No information	NA	NA	NA			NA
		g.chr17:38,528,996_38,530,402del	C7: Woman with bilateral BC (diagnosed at 34)	Triple negative	NA	F7: Nothing			NA
	Exons 1a-2 '~5-10 kb	g.chr17: 43120817-43127573del	C8: Woman with bilateral BC (diagnosed at 42)	NA	BRCA1: c.1486C>T/p.Arg496Cys (VUS)	F8: Sister with bilateral BC (diagnosed at 42 and 56) and OC (diagnosed at 62), 2 paternal nieces with BC (diagnosed at 41 and 54), paternal grand-mother with BC (diagnosed before 38)		No	Sister and paternal niece with BC carries the 2 variants
		g.chr17: 43120817-43127573del	C9: Woman with BC (diagnosed at 43)	Grade 3	No	F9: Mother with BC (diagnosed at 69), paternal aunt with BC (diagnosed at 52), paternal grand-mother with 2 BC (diagnosed at 77 and 84), paternal grand-aunt with CC (diagnosed at 62), paternal cousin with BC (diagnosed at 41)		No	Daughter CF carries the variant, paternal aunt and cousin CF don't carry the variant
		g.chr17: 43120817-43127573del	C10: Woman with BC, OC and CC (diagnosed at 53, 57 and 61)	Grade 3, RO+, RP-, HER2-+	BRCA1: c.671-12G>A (Likely benign)	F10: 2 brothers with CC (diagnosed at 46 and 44), paternal cousin with BC (diagnosed at 46 and 50)		No	Mother CF and 2 nieces CF don't carry the variant, niece CF carries the variant
		g.chr17: 43121312-43127961del	C11: Woman with bilateral BC (diagnosed at 36 and 46)	Triple negative	No	F11: Paternal aunt with BC (diagnosed at 71), paternal uncle with PC (diagnosed before 60), paternal cousin with BC (diagnosed at 39), paternal cousin with BC (diagnosed at 34)		No	Paternal cousin with BC carries the variant
		g.chr17: 43120725-43127972del	C12: Woman with BC (diagnosed at 42)	NA	No	F12: Paternal cousin with BC (diagnosed <50)		No	Daughter CF carries the variant.
	Exons 1a-2 '~13-14 kb	g.chr17: 43118518-43131925del	C13: Woman with BC (diagnosed at 64)	NA	NA	F13: Mother with BC (diagnosed at 44 and 48), father with BC (diagnosed at 62), daughter with BC (diagnosed at 41)		No	Daughter with BC carries the variant
	Exons 1a-1b	g.chr17:38,530,479_38,536,047del	C14: Woman with bilateral BC (diagnosed at 50 et 57) and CC (diagnosed at 60)	NA	NA	F14: Sister with BC and SC (diagnosed at 59), niece with BC (diagnosed at 58), another niece with BC (diagnosed at 50), maternal grand-mother with BC (diagnosed before 52), 2 maternal aunts with BC (diagnosed before 42 and 50), maternal cousin with BC (diagnosed at 50), 4 paternal cousins with PrC (diagnosed at 73 or before 70) and paternal cousin with BC		No	Niece with BC (diagnosed at 58) does not carry the variant
	Triplication	Triplication NBR2-1 et exons 1 et 2	C15 : Woman with BC (diagnosed at 52 and 60)	Grade 3	BRCA2 c.3267G>A/p.(Gln1089=) (VUS)	F15: Mother with BC (diagnosed at 61), maternal grand-mother with BC (diagnosed at 43),	5	No	Daughter CF (39y) doesn't carry the variant
	?	Triplication NBR2-1 et exons 1 et 2	C28: Woman with breast cancer (diagnosed at 37)		BRCA2 : c.2919G>A	F28 : Maternal aunt with breast cancer (diagnosed at 45) and other maternal aunt with breast cancer (diagnosed at 70)	5	No	No information
	Triplication	Triplication NBR2-1 et exons 1 et 2	C16: Woman with BC (diagnosed at 36)	Grade 3, RH+, HER2-	BRCA2: c.6591_6592del/p.(Glu2198Asnfs*4) (Pathogenic)	F16: Nothing	5	No	NA
	Triplication	Triplication NBR2-1 et exons 1 et 2	C17: Woman with bilateral BC (diagnosed at 54)	Grade 1, RH+	No	F17: Mother with BC (diagnosed at 82), maternal aunt with BC (diagnosed at 41), maternal cousin with BC (diagnosed at 48), maternal uncle with CC (diagnosed at 80), and another maternal cousin with BC (diagnosed at 35).	5	No	NA
	Triplication	Triplication NBR2-1 et exons 1 et 2	C18: Woman with BC (diagnosed at 33)	Grade 3, RH+, HER2+	BRCA2: c.433_435del/p.(Val145del) (VUS)	F18: Paternal aunt with BC (diagnosed at 57)	5	No	Brother and other sister CF do not carry the variant, mother CF carries the variant
	Triplication	Triplication NBR2-1 et exons 1 et 2	C19: Woman with BC (diagnosed at 41)	No information	No	F19: Mother with BC (diagnosed at 49), Paternal grand-mother with BC (diagnosed at?), 2 paternal grand-aunt with bilateral BC (diagnosed at ?)			Mother does not carry the variant and Father carries the variant
	Triplication		C20: Woman with breast cancer (diagnosed at 37)	Garde 2, RH+	BRCA2 : c.2919G>A/p.(Ser973=) (VUS)	F20 : 2 Maternal aunts with BC (diagnosed at 45 and 70) and paternal uncle with PrC (diagnosed at ?)			NA
CF, cancer-free; BC: Breast Cancer; OC: Ovary Cancer; CC: Colon Cancer; PC: Pancreas Cancer; PrC: Prostate Cancer; SC: Stomach Cancer; VUS: variant of unknown significance; NA: not available
